# Supplementary material for: Stepwise Threshold Clustering: A New Method for Genotyping MHC Loci Using Next-Generation Sequencing Technology
Source: PLoS One. 2014 Jul 18;9(7):e100587. doi: 10.1371/journal.pone.0100587 (PMC4103772; doi:10.1371/journal.pone.0100587)
Supplement: File S2 — R functions to accompany the runSTC.R script (File S1). (R) [file pone.0100587.s012.r]

#converts IDS from sequencing IDs to original IDs
convert.IDs <- function(reads){
	
	#split reads into identified and non identified reads
	A <- reads[is.na(reads$genericID) == FALSE,]
	B <- reads[is.na(reads$genericID) == TRUE,]

	#add sampleIDs that correspond to genericIDs
	new <- ddply(A, .(genericID), match.IDs)

	#add on NA rows
	B$sampleID <- NA
	new <- rbind(new,B)

	#write to file
	if (nrow(new) == nrow(reads)){
		write.csv(new,"reads_converted.csv")
	}

	return(new)
}

#matches IDs between reads table and barcode table
match.IDs <- function(genID){

	#which sampleID matches the generic ID
	match <- bc_table[bc_table$genericID == genID$genericID[1],"sampleID"]
	
	#change IDs
	genID$sampleID <- match

	#output new data
	return(genID)
		
}


#changes the fishIDs for duplicated samples
dup.IDs <- function(reads,bc_table){

	#which samples (if any) were run in duplicate (or more)
	reptab <- table(bc_table$sampleID)
	dups <- reptab[reptab > 1]
	sings <- reptab[reptab == 1]
	
	#if there are duplicates
	if(length(dups) > 1){

		#list of samples run in duplicate
		duplicates <<- data.frame("sampleID" = names(dups))
		singles <<- data.frame("sampleID" = names(sings))
		A_samples <<- rbind(singles,duplicates)
		write.csv(duplicates,"duplicate_samples.csv", row.names = FALSE)

		#subset reads from duplicated and non-duplicated samples
		dup_reads <- reads[reads$sampleID %in% duplicates$sampleID,]
		non_reads <- reads[reads$sampleID %in% singles$sampleID,]
		dup_reads$sampleID <- as.character(dup_reads$sampleID)

		#subset barcode table for duplicated samples
		dup_bc_table <- bc_table[bc_table$sampleID %in% duplicates$sampleID,]
		dup_bc_table <- dup_bc_table[order(dup_bc_table$sampleID,dup_bc_table$fbc),]
		dup_bc_table$sampleID <- as.character(dup_bc_table$sampleID)
		
		#rename duplicate samples in barcode table
		new_duplicates <- rbind()
		for (i in duplicates$sampleID){
			new <- dup_bc_table[dup_bc_table$sampleID == i,]
			new$sampleID[2] <- paste(new$sampleID[1],"b", sep = "")
			new_duplicates <- rbind(new_duplicates,new)
		}
		dup_bc_table <- new_duplicates
	
		#create barcode table with new duplicate names (i.e. those including "b")
		new_dup_names <<- data.frame(sampleID = dup_bc_table$sampleID)

		#change duplicate sample IDs to include "b" samples 
		for (i in c(1:nrow(dup_reads))){
			for (j in c(1:nrow(dup_bc_table))){
				if (dup_reads$fbc[i] == dup_bc_table$fbc[j] & dup_reads$rbc[i] == dup_bc_table$rbc[j]) {
					dup_reads$sampleID[i] <- dup_bc_table$sampleID[j]
				}
			}
		}

		#combine reads from duplicated and non-duplicated samples
		new_reads <- rbind(non_reads,dup_reads)
		
		#write updated table of reads to file
		write.csv(new_reads,"reads.csv", row.names = FALSE)
	
		output <- new_reads
	} else {
		#write updated table of reads to file
		write.csv(reads,"reads.csv", row.names = FALSE)
		output <- reads
	}
	
	return(output)

}	


#perform the alignment and write to file
align.seqs <- function(sample_seqs){
	aln_seqs <- clustal(sample_seqs, exec = "clustalw2", quiet = TRUE, gapopen = 15,gapext = 0.66)	
	
	#write alignment to file
	write.dna(aln_seqs,file = paste(sample,".aln",sep = ""), format = "interleaved")

	#re-upload alignment in character format
	aln_seqs <- read.dna(file = paste(sample,".aln",sep = ""), format = "interleaved", as.character = TRUE)
	
	#manually adjust alignments
	aln_seqs <- t(apply(aln_seqs,1,adjust.aln))
	
	#write alignment to file
	write.dna(aln_seqs,file = paste(sample,".aln",sep = ""), format = "interleaved")

	#re-upload alignment in character format
	aln_seqs <- read.dna(file = paste(sample,".aln",sep = ""), format = "interleaved", as.character = FALSE)

	return(aln_seqs)
}

#hand adjust alignments to take into account artifacts with an "A" inserted after 1st basepair
adjust.aln <- function(row_i) {

	if(row_i[1] == "-" & row_i[2] == "t"){
		row_i[1] <- "t" 
		row_i[2] <- "-"
	}
	
	return(row_i)
}


#create a table of all unique pairwise combinations of alleles

make.pairs <- function(seqs,seq_table){

	output <- ddply(temp_seqs,.(numb),mp)
	names(output) <- c("pairID","seq1","seq2")
	
	#remove pairs where both are singletons
	non_singletons <- names(seq_table[seq_table > 1])
	output <- output[output$seq1 %in% non_singletons | output$seq2 %in% non_singletons,]

	return(output)

}

mp <- function(s1){
	temp_seqs2 <- temp_seqs[c(s1$numb:nrow(temp_seqs)),]
	
	if(s1$numb == nrow(temp_seqs)){
		out <- data.frame(s1$ID,x = s1$ID)
	} else {
		x <- apply(temp_seqs2,1,mp2)
		out <- data.frame(s1$ID,x)
	}
	return(out)
}

mp2 <- function(s2){
	out <- (s2[1])
	return(out)
}


####################
#characterize differences between two given sequences
####################
pair.diffs <- function(pair) {
	
	#extract the mismatch base pairs for each pair of alleles
	allele_a <- as.character(all_pairs[pair,2])
	allele_b <- as.character(all_pairs[pair,3])
	aln_sub <- aln_seqs[c(allele_a,allele_b),]
	
	
	#if the two alleles are really similar, re-align to correct for rare alignment errors
	if(dist[allele_a,allele_b] > 100 & allele_a != allele_b){
		sub_alleles <- alls[c(allele_a,allele_b)]
		sub_aln <- clustal(sub_alleles, exec = "clustalw2", quiet = TRUE, gapopen = 15,gapext = 0.66)
		write.dna(sub_aln,file = "sub_aln", format = "interleaved")
		aln_sub <- read.dna("sub_aln", format = "interleaved", as.character = TRUE)
	}

	
	
	
	seq_a <- aln_sub[1,]
	seq_b <- aln_sub[2,]
	nreads_a <- seq_table[names(seq_table) == allele_a]
	nreads_b <- seq_table[names(seq_table) == allele_b]
	x_cols <- c()
	mismatch_a <- c()
	mismatch_b <- c()
	for (i in c(1:length(seq_a))){
		if (seq_a[i] != seq_b[i]){
			x_cols <- c(x_cols,i)
			mismatch_a <- c(mismatch_a,seq_a[i])
			mismatch_b <- c(mismatch_b,seq_b[i])
		}
	}
	
	#for pairs with no mismatches
	if(length(mismatch_a) == 0){
		mismatch_a <- 0
		mismatch_b <- 0
		x_cols <- 0
	}
	
	output <- list( 
		"pairID" = pair,
		"columns" = x_cols, 
		"allele_one" = allele_a,
		"allele_two" = allele_b,
		"mismatch_a" = mismatch_a, 
		"mismatch_b" = mismatch_b,
		"nreads_a" = as.vector(nreads_a),
		"nreads_b" = as.vector(nreads_b)
	)
	
	return(output)
	
}

####################
# determine if a given pair is to useable
####################
type.pair <- function(diffs){
	
	diff_numb <- length(diffs$columns)
	a <- diffs$mismatch_a
	b <- diffs$mismatch_b
	
	if(diff_numb > 3 | diff_numb == 0){
		return()
	}
	
	#type 1 pairs
	if (diff_numb == 1 & (a == "-" || b == "-")){
		return(pair.info(type = 1, diffs))
	}

	
	if (diff_numb == 2){	
		#type 2 pairs
		if((a[1] == "-" & b[2] == "-") | (a[2] == "-" & b[1] == "-")) {
			return(pair.info(type = 2, diffs))
		}
	
		
		#type 3 pairs	
		ab <- c(a,b)
		if(sum(ab == "-") == 1){
			return(pair.info(type = 3, diffs))
		}
	}	
	if (diff_numb == 3){	
		ab <- c(a,b)
		if(sum(ab == "-") == 1){
			return(pair.info(type = 3, diffs))
		}
	}	
	
}


####################
# add pair info to list of pairs
####################
pair.info <- function(type, diffs){

		#pull sequence from indel_diffs_all table	
		seq1 <- aln_seqs[rownames(aln_seqs) == diffs$allele_one,]
		seq2 <- aln_seqs[rownames(aln_seqs) == diffs$allele_two,]

		#remove indels	sequences
		seq1 <- seq1[seq1 != "-"]
		seq2 <- seq2[seq2 != "-"]

		#calculate lengths
		l1 <- length(seq1)
		l2 <- length(seq2)
		
		#combine info 
		info <-  data.frame(
			pairID = diffs$pairID,
			seq1 = all_pairs[pair,2],
			seq2 = all_pairs[pair,3],
			nreads1 = diffs$nreads_a,	
			nreads2 = diffs$nreads_b,
			l1,
			l2,
			type = type
		)
	
		return(info)
		
		
}
	

####################
#reorder rows so that sequence one has the correct length
####################
seq.one.correct <- function(row_i){
	
	require(plyr)

	#create new output row
	row_out <- row_i

	if((row_out$l1 != amp_length) | ((row_out$l1 == row_out$l2) & (row_out$nreads2 > row_out$nreads1))){
			
		#swap values
		row_out$seq1 <- row_i$seq2
		row_out$seq2 <- row_i$seq1
		row_out$nreads1 <- row_i$nreads2
		row_out$nreads2 <- row_i$nreads1
		row_out$l1 <- row_i$l2
		row_out$l2 <- row_i$l1
	} 
	return(row_out)
	
}

####################
#adjust list of pairs to combine
####################
	
adjust.pairs <- function(seqs, dist, seqpath){	
	
	
	#remove pairs where neither sequence is 213 basepairs
	pairs_use <- pairs_use[pairs_use$l1 == amp_length | pairs_use$l2 == amp_length,]
		
	#change pairs so first sequence is the one that is 213 basepairs longs
	pairs_use <- ddply(pairs_use,.(pairID),seq.one.correct)
		
	#sort by most common to least common good allele
	pairs_use <- pairs_use[order(pairs_use$nreads1, decreasing = TRUE),]
	
	#keep only pairs where the first sequence is more common
	pairs_use <- pairs_use[(pairs_use$nreads1 > pairs_use$nreads2),]	
	
	#keep only type 3 and 4 pairs if first member has more than 3 reads
	pairs_use <- pairs_use[((pairs_use$type == 3 | pairs_use$type == 4) & pairs_use$nreads1 > 3) | ((pairs_use$type == 1) | (pairs_use$type == 2)),]
	
	return(pairs_use)
	
}


###############################################
#combine pairs
###############################################
combine.pairs <- function(read){

	read_out <- read

	#check if the sequence is listed as a sequence to be combined
	if(read_out$seqID %in% pairs_use$seq2){
	
		#if so, combine it
		possible_pairs <- pairs_use[pairs_use$seq2 == read_out$seqID,]
		read_out$seqID <- possible_pairs$seq1[1]
	}

	return(read_out)

}


####################################
#rename clusters from generic numbers to most frequent sequence
####################################
name.clusters <- function(row_i){
	row_i$name <- row_i$sequence[1]
	return(row_i)
}


####################################
# assign sequences into clusters
####################################
cluster.seq <- function(s){
			
			seq_id <<- s$sequence
			
			#is the cluster table empty?
			if(nrow(temp_cluster_table) == 0){
				
				#start a new cluster with that sequence
				output <- data.frame(cluster = 1, 
					sequence = s$sequence, 
					nreads = s$nreads
				)
				
			#if the cluster table is not empty
			} else {
	
				#which sequences are currently the most frequent in each cluster?
				tops <- ddply(temp_cluster_table,.(cluster), identify.tops)
				
				#which cluster is the closest to the target sequence
				tops <- tops[order(tops$sim,decreasing = TRUE),]
				best_match <- tops[1,]
				
				#if the best match is creater than the cutoff
				if (best_match$sim[1] >= cutoff){
					output <- data.frame(cluster = best_match$cluster[1],
							sequence = seq_id, 
							nreads = s$nreads
					)
				} else {
					output <- data.frame(cluster = max(temp_cluster_table$cluster)+1,
						sequence = seq_id, 
						nreads =  s$nreads
					)
				}
			}

		#write sequence result to cluster table					
		temp_cluster_table <<- rbind(temp_cluster_table,output)
		
		#
		return(output)

		}


####################################
# identify the top sequences in each cluster and how similar they are to a given sequence	
####################################
identify.tops <- function(cl){

	#order by number of reads
	cl <- cl[order(cl$nreads,decreasing = TRUE),]
						
	#pull top sequence
	new_top <- data.frame(cluster = cl$cluster[1], 
		sim =  dist[as.character(cl$sequence[1]),as.character(seq_id)] 
	)
				
	return(new_top)
					
}
					
####################################
#perform the replicates at a given cutoff
####################################
repeat.cluster <- function(cutoff, start_seqs, reps){
	
	#refactor start_seqs to remove cluster sequences from levels()
	start_seqs$sequence <- factor(start_seqs$sequence)		
	
	#generate replicate table
	rep_table <- data.frame(reps = seq(1:reps))
	
	#run individual clustering for each replicate
	replicates <- ddply(rep_table,.(reps), cluster)
	
	#clean up table
	output <- t(replicates[,-1])
	
	#output results from all replicates	
	return(output)
	
}

####################################
# perform a single clustering replicate 
####################################
cluster <- function(rep) {

		#refactor start_seqs to remove cluster sequences from levels()
		start_seqs$sequence <- factor(start_seqs$sequence)		
		
		#table of sequences to be clustered 
		start_table <- start_seqs	
		
		#remove any existing cluster assignments
		start_table$cluster <- NA
		
		#shuffle start_table
		start_table <- start_table[sample(nrow(start_table), replace = FALSE),]

		#generate empty table for clusters
		temp_cluster_table <<- data.frame()
		
		#assign sucessive sequences to clusters
		cluster_table <- ddply(start_table,.(sequence), cluster.seq)
		
		#sort the cluster table by cluster  
		cluster_table <- cluster_table[order(cluster_table$cluster,cluster_table$nreads, decreasing = TRUE),]

		#assign clusters to the most frequent read in each cluster
		cluster_table <- ddply(cluster_table,.(cluster),name.clusters)

		#record cluster assignments for each sequence in the assignments table
		cluster_table <- cluster_table[order(as.character(cluster_table$sequence)),]
		output <- as.character(cluster_table$name)

		return(output)
}
		
		
		
		
		
		

####################################
#parse clustering replicates
####################################
parse.results <- function(start_seqs,cluster_replicates){
		
	#refactor start_seqs to remove cluster sequences from levels()
	start_seqs$sequence <- factor(start_seqs$sequence)		
		
	#add rownames to replicates
	rownames(cluster_replicates) <- sort(as.character(start_seqs$sequence))

	#initiate new results table
	results <- start_seqs

	#assign each sequence its most commonly assigned cluster over the replicates
	results <- ddply(results,.(sequence),assign.mode)
		
	#sort results by cluster assigment
	results <- results[order(results$cluster,results$nreads,decreasing = TRUE),]
	
	return(results)
}	


#assign clusters based on modal assignment over replicates
assign.mode <- function(row_i){
	r <- sort(table(cluster_replicates[row_i$sequence,]), decreasing = TRUE)
	row_i$cluster <- names(r)[1]
	return(row_i)
}


####################################
#functions to separate clusters into categories
####################################
pull.goods <- function(cl){
	
	#create output 
	output <- c()
	
	#does the cluster pass the size criteria?
	if (sum(cl$nreads) >= size_thresh*nrow(sample_reads) ){
	
		#is it only one sequence?
		if(nrow(cl) == 1){
				output <- cl
		
		
		#is there more than one sequence?
		} else {
			if(cl$nreads[1]/cl$nreads[2] > dom_thresh){				
				output <- cl
			
			}
		}
	}
	
	#output cluster if good
	return(output)
		
}	


pull.smalls <- function(cl){
	
	#create output 
	output <- c()
	
	#does the cluster pass the size criteria?
	if (sum(cl$nreads) < size_thresh*nrow(sample_reads) ){
		output <- cl
	
		
		if (sum(output$nreads == 1) == nrow(output)){
			output <- output[order(as.numeric(as.character(output$sequence)), decreasing = FALSE), ]
			output$cluster <- output$sequence[1]
		}
	}
		
	#output cluster if small
	return(output)

}	

pull.ambs <- function(cl){
	
	#create output 
	output <- c()
	
	#does the cluster pass the size criteria?
	if (sum(cl$nreads) >= size_thresh*nrow(sample_reads) ){
	
		#does it have more than one sequence?
		if(nrow(cl) > 1 & cl$nreads[1]/cl$nreads[2] <= dom_thresh){
				output <- cl
		}
	}
	
		
	#output cluster if small
	return(output)

}	


####################################
#functions to deal with ambiguous alleles
####################################
#create summary data for top two sequences in an ambiguous cluster
amb.summary <- function(cl){
		
	#what are the top two sequences?
	top1 <- as.character(cl$sequence[1])
	top2 <- as.character(cl$sequence[2])
	
	#how long are they?
	length1 <- summary(alls[top1])[1]
	length2 <- summary(alls[top2])[1]

	#how may reads in the top two?
	reads1 <- cl$nreads[1]
	reads2 <- cl$nreads[2]
		
	#what is the proportion of reads for the top two?
	prop1 <- reads1/(reads1 + reads2)
	prop2 <- reads2/(reads1 + reads2)

	#calculate potential nreads
	nreads1 <- round(prop1*sum(cl$nreads))
	nreads2 <- round(prop2*sum(cl$nreads))

	#potential nreads if top two are combined
	nreads3 <- sum(cl$nreads)
	
	#output if cluster is divided into two
	new1 <- data.frame(cluster = cl$cluster[1], sequence = as.numeric(top1), nreads = nreads1)
	new2 <- data.frame(cluster = top2, sequence = as.numeric(top2), nreads = nreads2)

	A <- cbind(top1,length1,reads1,prop1,nreads1)
	B <- cbind(top2,length2,reads2,prop2,nreads2)
	
	output <- list(top1 = top1,top2 = top2,
		length1 = length1,length2 = length2,
		reads1 = reads1,reads2 = reads2,
		prop1 = prop1,prop2 = prop2,
		nreads1 = nreads1,nreads2 = nreads2,nreads3 = nreads3,
		new1 = new1, new2 = new2)
}
	

#create summary data for top  sequences and third sequence in an ambiguous cluster
amb.summary.redo <- function(cl){
		
	#what are the top two sequences?
	top1 <- as.character(cl$sequence[1])
	top2 <- as.character(cl$sequence[3])
	
	#how long are they?
	length1 <- summary(alls[top1])[1]
	length2 <- summary(alls[top2])[1]

	#how may reads in the top two?
	reads1 <- cl$nreads[1]
	reads2 <- cl$nreads[3]
		
	#what is the proportion of reads for the top two?
	prop1 <- reads1/(reads1 + reads2)
	prop2 <- reads2/(reads1 + reads2)

	#calculate potential nreads
	nreads1 <- round(prop1*sum(cl$nreads))
	nreads2 <- round(prop2*sum(cl$nreads))

	#potential nreads if top two are combined
	nreads3 <- sum(cl$nreads)
	
	#output if cluster is divided into two
	new1 <- data.frame(cluster = cl$cluster[1], sequence = as.numeric(top1), nreads = nreads1)
	new2 <- data.frame(cluster = top2, sequence = as.numeric(top2), nreads = nreads2)

	A <- cbind(top1,length1,reads1,prop1,nreads1)
	B <- cbind(top2,length2,reads2,prop2,nreads2)
	
	output <- list(top1 = top1,top2 = top2,
		length1 = length1,length2 = length2,
		reads1 = reads1,reads2 = reads2,
		prop1 = prop1,prop2 = prop2,
		nreads1 = nreads1,nreads2 = nreads2,nreads3 = nreads3,
		new1 = new1, new2 = new2)
}


#create summary data for top  sequences and third sequence in an ambiguous cluster
amb.summary.redo2 <- function(cl){
		
	#what are the top two sequences?
	top1 <- as.character(cl$sequence[2])
	top2 <- as.character(cl$sequence[3])
	
	#how long are they?
	length1 <- summary(alls[top1])[1]
	length2 <- summary(alls[top2])[1]

	#how may reads in the top two?
	reads1 <- cl$nreads[2]
	reads2 <- cl$nreads[3]
		
	#what is the proportion of reads for the top two?
	prop1 <- reads1/(reads1 + reads2)
	prop2 <- reads2/(reads1 + reads2)

	#calculate potential nreads
	nreads1 <- round(prop1*sum(cl$nreads))
	nreads2 <- round(prop2*sum(cl$nreads))

	#potential nreads if top two are combined
	nreads3 <- sum(cl$nreads)
	
	#output if cluster is divided into two
	new1 <- data.frame(cluster = top1, sequence = as.numeric(top1), nreads = nreads1)
	new2 <- data.frame(cluster = top2, sequence = as.numeric(top2), nreads = nreads2)

	A <- cbind(top1,length1,reads1,prop1,nreads1)
	B <- cbind(top2,length2,reads2,prop2,nreads2)
	
	output <- list(top1 = top1,top2 = top2,
		length1 = length1,length2 = length2,
		reads1 = reads1,reads2 = reads2,
		prop1 = prop1,prop2 = prop2,
		nreads1 = nreads1,nreads2 = nreads2,nreads3 = nreads3,
		new1 = new1, new2 = new2)
}
		
	
	
#should one or both clusters be classified as small?
check.smalls <- function(summary,cl){

	#if both top alleles are not 213 bp, then classify the cluster as small
	if(summary$length1 != 213 & summary$length2 != 213){
		output <- cl
	} else {
		output <- c()
	}		
		
	#if just the second top allele is not 213bp 
	if (summary$length2 != 213){

		#check the third sequence length
		if(summary(alls[as.character(cl$sequence[3])])[1] == 213)	{	
		
			#move second sq
			summary <-amb.summary.redo(cl)
		
			#if only the top allele meets the size threshold, classify the second as a small allele
			if(summary$nreads1 > size_thresh*nrow(sample_reads) & summary$nreads2 < size_thresh*nrow(sample_reads)){
				output <- summary$new2
			} 	
		
			#if neither meets size threshold count both as small alleles
			if(summary$nreads1 < size_thresh*nrow(sample_reads) & summary$nreads2 < size_thresh*nrow(sample_reads)){
				output <- rbind(summary$new1,summary$new2)
			}		
		
		} else {
			if(summary$nreads3 < size_thresh*nrow(sample_reads)){
				output <- cl
			} 
		}
	}
	
	#if both are the correct length
	if(summary$length1 == 213 & summary$length2 == 213) {
	
		#if only the top allele meets the size threshold, classify the second as a small allele
		if(summary$nreads1 > size_thresh*nrow(sample_reads) & summary$nreads2 < size_thresh*nrow(sample_reads)){
			output <- summary$new2
		} 	
		
		#if neither meets size threshold count both as small alleles
		if(summary$nreads1 < size_thresh*nrow(sample_reads) & summary$nreads2 < size_thresh*nrow(sample_reads)){
			output <- rbind(summary$new1,summary$new2)
		}
	}
	return(output)
}
	
#should one or both clusters be classified as good?
check.good <- function(summary,cl){
	
	#if both top alleles are not 213 bp, then do nothing
	if(summary$length1 != 213 & summary$length2 != 213){
		output <- c()
	}		
		
	#if just the second top allele is not 213bp 
	if (summary$length2 != 213){

		#check the third sequence length
		if(summary(alls[as.character(cl$sequence[3])])[1] == 213)	{	
		
			#move second sq
			summary <-amb.summary.redo(cl)

			#if both meet the size theshold
			if(summary$nreads1 > size_thresh*nrow(sample_reads) & summary$nreads2 > size_thresh*nrow(sample_reads)){
				output <- rbind(summary$new1,summary$new2)
			}
		
			#if only the top allele meets the size threshold, classify the whole as a good allele
			if(summary$nreads1 > size_thresh*nrow(sample_reads) & summary$nreads2 < size_thresh*nrow(sample_reads)){
				output <- cl
			} 	
		
			#if neither meets size threshold
			if(summary$nreads1 < size_thresh*nrow(sample_reads) & summary$nreads2 < size_thresh*nrow(sample_reads)){
				output <- c()
			}
		} else {
			if(summary$nreads3 > size_thresh*nrow(sample_reads)){
				output <- cl
			}
		}
	}
	
	#if just the first top allele is not 213bp 
	if (summary$length1 != 213 & summary$length2 == 213){

		#check the third sequence length
		if(summary(alls[as.character(cl$sequence[3])])[1] == 213)	{	
		
			#move second sq
			summary <-amb.summary.redo2(cl)

			#if both meet the size theshold
			if(summary$nreads1 > size_thresh*nrow(sample_reads) & summary$nreads2 > size_thresh*nrow(sample_reads)){
				output <- rbind(summary$new1,summary$new2)
			}
		
			#if only the top allele meets the size threshold, classify the whole as a good allele
			if(summary$nreads1 > size_thresh*nrow(sample_reads) & summary$nreads2 < size_thresh*nrow(sample_reads)){
				cl$cluster <- cl$sequence[2]				
				output <- cl
			} 	
		
			#if neither meets size threshold
			if(summary$nreads1 < size_thresh*nrow(sample_reads) & summary$nreads2 < size_thresh*nrow(sample_reads)){
				output <- c()
			}
		} else {
			if(summary$nreads3 > size_thresh*nrow(sample_reads)){
				cl$cluster <- cl$sequence[2]
				output <- cl
			}
		}
	}
	
	#if both are the correct length
	if(summary$length1 == 213 & summary$length2 == 213) {
	
		#if both meet the size theshold
		if(summary$nreads1 > size_thresh*nrow(sample_reads) & summary$nreads2 > size_thresh*nrow(sample_reads)){
			output <- rbind(summary$new1,summary$new2)
		}
		
		#if only the top allele meets the size threshold, classify the whole as a good allele
		if(summary$nreads1 > size_thresh*nrow(sample_reads) & summary$nreads2 < size_thresh*nrow(sample_reads)){
			output <- cl
		} 	
		
		#if neither meets size threshold
		if(summary$nreads1 < size_thresh*nrow(sample_reads) & summary$nreads2 < size_thresh*nrow(sample_reads)){
			output <- c()
		}
	}
	return(output)
}


#collapse the table of good clusters into a table of true alleles
collapse.goods <- function(cl){
		
	#create new data for allele
	output <- data.frame(allele = cl$sequence[1], 
		nreads = sum(cl$nreads), 
		sampleID = sample,
		proportion = sum(cl$nreads)/(nrow(sample_reads)))

	return(output)
}


# cross check small cluster against common true alleles
cross.check <- function(cl){

	#if the cluster matches a common true allele and the cluster is at least 3 reads in total
	if(cl$allele[1] %in% alleles.cc & sum(cl$nreads) > 2){

		#how many reads in the sample
		sample_reads <- samples_summary[samples_summary$sampleID == as.character(cl$sampleID[1]),"read_number_used"]

		#add the cluster to true alleles 
		output <- data.frame(allele = cl$allele[1], 
			nreads = sum(cl$nreads), 
			sampleID = cl$sampleID[1], 
			proportion = sum(cl$nreads)/sample_reads, 
			status = "dropped"
		)	
	
	all_TAs <<- rbind(all_TAs,output)
	}
}


#indicate chimeras in TA list
indicate.chimeras <- function(al){
	if(al$allele[1] %in% chimeras$seqID){
		output <- data.frame(al, chimera = "yes")
	} else {
		output <- data.frame(al, chimera = "no")
	}
}


#indicate incorrect length TAs in TA list
indicate.lengths <- function(al){

	if(alleles_summary[alleles_summary$allele == al$allele[1], "length"] == 213){
		output <- data.frame(al, correct_length = "yes")
	} else {
		output <- data.frame(al, correct_length = "no")
	}
}


#update samples summary to account for dropped alleles
new.TAs <- function(samp){

	output <- data.frame(sampleID = samp$sampleID[1], 
		dropped_alleles = nrow(samp[samp$status == "dropped",]),
		all_alleles = nrow(samp),
		chimeras = nrow(samp[samp$chimera == "yes",]),
		incorrect_length = nrow(samp[samp$correct_length == "no",]),
		true_alleles = nrow(samp[samp$chimera == "no" & samp$correct_length == "yes",])
	)

	
	return(output)
}


#create list of final true alleles along with a fasta file and alignment of just true alleles
final.list <- function(all_TAs,alls){

	#write names of haplotypes to file
	TAs <- names(table(all_TAs$allele))
	write(TAs,"TA_list", ncolumns = 1)

	#extract just the true allele sequences
	TA_seqs <- alls[TAs]
	write.dna(TA_seqs, file = "TAs.fasta",format = "fasta")

	#align sequences using clustal
	aln_alleles <- clustal(TA_seqs, exec = "clustalw2", quiet = TRUE, pw.gapopen = 20)

	#write alignment to file
	write.dna(aln_alleles,file = "TAs.aln", format = "interleaved")
	
	#create distance matrix
	TA_dist <- dist.dna(aln_alleles, model = "JC69", as.matrix = TRUE)
	
	#write distace matrix to file
	write.csv(TA_dist,"TA_dist.csv")
}


#calculate summary statistics for each true allele
create.allele.summary <- function(al){
	
	#length of allele
	length <- summary(alls[as.character(al$allele)])[1]	
	
	#nuber of of samples where it was found
	samples_found <- nrow(al)
	
	#percentage of all samples in library where found
	perc_samples <- samples_found/nrow(samples)
	
	#number of times appeared as a good cluster
	goods <- nrow(al[al$status == "good",])
	
	#number of times the sample was dropped
	dropped <- nrow(al[al$status == "dropped",])
	
	#% of samples where dropped
	perc_dropped <- dropped/(dropped + goods)
	
	#average cluster size (mean proportion of total reads)
	mean_cluster_size <- mean(al$proportion)
	
	#average cluster size of good clusters
	g <- al[al$status == "good",]
	mean_good_cluster_size <- mean(g$proportion)	
	
	#is it a chimera?
	chimera <- al$chimera[1]
	
	#does it only appear once in the data set?
	if(samples_found == 1){
		singleton <- "yes"
	} else {
		singleton <- "no"
	}
	
	output <- data.frame(length,
		samples_found,
		perc_samples,
		goods,
		dropped,
		perc_dropped,
		mean_cluster_size, 
		mean_good_cluster_size,
		chimera,
		singleton
	)
	
	return(output)
}

#create summary info for each sequence in the sample
create.sequence.summary <- function(old_seq_table){
	
	temp_seq_table <- data.frame(old_seq_table)
	names(temp_seq_table) <- c("sequence","nreads")
		
	sequence_summary <- ddply(temp_seq_table,.(sequence), seq.tables)
	
	return(sequence_summary)
}
	
#create sequence tables for each fish
seq.tables <- function(s){

	#calculate length of sequence
	s$length <- summary(alls[as.character(s$sequence)])[1]
	
	#if it was in a good cluster
	if(s$sequence %in% good_clusters$sequence){	
		s$cluster <- good_clusters[good_clusters$sequence == as.character(s$sequence),"cluster"]
		s$class <- "good"
	} else {
		s$cluster <- NA
		s$class <- NA
	}
		
	#if it was in an ambiguous cluster
	if(s$sequence %in% amb_clusters$sequence){
		
		#what were the top two sequences in the cluster
		clus <- amb_clusters[amb_clusters$sequence == as.character(s$sequence),]
		clus <- amb_clusters[amb_clusters$cluster == clus$cluster,]
	
		s$cluster <- paste(clus$sequence[1],clus$sequence[2], sep = "/")
		s$class <- "ambiguous"
		
	}
	
	#was it a small cluster
	if(s$sequence %in% small_clusters$sequence){
		s$cluster <- small_clusters[small_clusters$sequence == as.character(s$sequence),"cluster"]
		s$class <- "small"
	} 
	
	#was it a true allele
	if(s$sequence %in% true_alleles$allele){
		s$true <- "yes"
	} else {
		s$true <- "no"
	}

	#indicate not combined for now	
	s$combined <- "NA"
	
	return(s)
	
	
}	


#update sequence summary table to account for combined sequences
combined.seqs <- function(s){

	#was it combined during phase 2
	if(s$sequence %in% pairs_use$seq2){
		combined <- pairs_use[pairs_use$seq2 == s$sequence, "seq1"]
		type <- pairs_use[pairs_use$seq2 == s$sequence, "type"]
		classification <- sequence_summary[sequence_summary$sequence == combined[1],"class"]
		cluster <- sequence_summary[sequence_summary$sequence == combined[1],"cluster"]
	
		s$combined <- as.character(combined[1])
		s$type <- type[1]
		s$class <- classification[1]
		s$cluster <- cluster[1]
	}
			return(s)
}


update.sequence.summary <- function(id){

	samp <<- as.character(id$sampleID[1])
	#check if skipped
	if(id$sampleID[1] %in% skip$sampleID){
	} else {
	
		#create a unique filename path for this sequence
		seqpath <- paste("output",id$sampleID[1],sep = "/")
	
		#upload sequence summary
		summ <- read.csv(paste(seqpath,"_sequence_summary.csv",sep = ""), row.names = 1)
	
		#add chimera indicator
		summ <- ddply(summ,.(sequence), add.chimera.indicator)	
		
		#update true allele status after the incorporation of dropped alleles	
		summ <- ddply(summ,.(sequence), add.dropped.indicator)	
		
		#write to file
		write.csv(summ,paste(seqpath,"_sequence_summary.csv",sep = ""), row.names = FALSE)	
	}
}
	
#update sequence summary table after accounting for chimeras
add.chimera.indicator <- function(s){
		
	if(s$cluster %in% chimeras$allele){
		s$cluster.chimera <- "yes"
		s$true <- "no"
	} else {
		s$cluster.chimera <- "no"
	}
	
	if(s$sequence %in% chimeras$allele){
		s$chimera <- "yes"
	} else {
		s$chimera <- "no"
	}
	
	return(s)
}	


#update sequence summary table after accounting for chimeras
add.dropped.indicator <- function(s){

	#what sample?
	samp_TAs <- all_TAs[all_TAs$sampleID == samp,]
	
	#what cluster(s)
	clus <- as.vector(strsplit(as.character(s$cluster),"/")[[1]])
	
	#pull TAs
	clus <- samp_TAs[samp_TAs$allele == clus[1],]
	
	if(nrow(clus) > 0 & clus$status[1] == "dropped"){
		#what cluster(s)
		clus <- as.vector(strsplit(as.character(s$cluster),"/")[[1]])
		s$dropped <- "yes"
		s$true <- factor("yes")
	} else {
		s$dropped <- "no"
	}

	
	return(s)
}	


#find possible recombinant sequences (including which sequences are possible parents)
find.recombs <- function(samp){

	#print sample
	sampleID <<- (as.character(samp$sampleID[1]))
	print(sampleID)
	
	#if there are only two alleles (i.e. no possiblity for two parents...)
	if(nrow(samp) < 3){
		
		possible_recombs <- c()

	#otherwise, proceed...
	} else {
	
		#create list of alleles found for the given sample	
		sample_alleles <- as.character(samp$allele)

		#create list of possible daughter/parent combinations 
		possibles <- create.possibles(sample_alleles)

		#search through each combination of daughter and parents, ignoring matches, for possible recombinants
		possible_recombs <- ddply(possibles,.(trio), check.possibles)
	
		return(possible_recombs)
	}
}


#create list of possible daugther parent combinations for a given sample
create.possibles <- function(sample_alleles){
	output <- data.frame()
	for (q in sample_alleles){	
		for (a in sample_alleles){
			for(b in sample_alleles){
				if (a != q & b != q & a != b) {
					output <- rbind(output,data.frame(seqID = q, parent1 = a, parent2 = b))
				}
			}
		}			
	}
	output <- data.frame(trio = seq(1:nrow(output)), output)		
}


#check all possible daughter/parent pairs for possible recombinants
check.possibles <- function(trio){

	#combine three sequences into one table
	seq.q <- aln_TAs[as.character(trio$seqID),]
	seq.a <- aln_TAs[as.character(trio$parent1),]
	seq.b <- aln_TAs[as.character(trio$parent2),]
	comb <- rbind(seq.a,seq.q,seq.b)

	#which sites are informative (where parents differ)
	inform_sites <- inform.sites(comb)

	#number of informative sitest
	numb_inform_sites <- length(inform_sites)

	#determie whether, at each site, the daughter matches one, both, or neither parent.
	parent <- apply(comb,2,determine.matches)					

	#how many sites match neither parent?
	unmatched_sites <- sum(is.na(parent))

	#only use pairings where there is a minimal number of unmatched sites
	if(unmatched_sites <= no_match){	
	
		#change sites where neither parent matches to zero
		parent[is.na(parent)] <- 0

		#determine range of sites over which to compare parent sequences with the daughter sequence
		site_range <- site.range(inform_sites)
		
		#calculate summary scores for every site along the site range
		scores <- calculate.scores(site_range,parent,inform_sites,numb_inform_sites,unmatched_sites)
		
		#if proportion for a given breakpoint is above the threshold
		sub <- scores[scores$proportion_inform > proportion & (scores$percentage_left > 0 & scores$percentage_right > 0),]
	
		#if there are breakpoints that meet the criteria		
		if(nrow(sub)>0){	
			#output data
			new <- data.frame(sampleID = sampleID,
				seqID = trio$seqID, 
				unmatched_sites,
				numb_inform_sites,
				start = sub[1,1],
				end = sub[nrow(sub),1],
				max.proportion_inform = max(sub$proportion_inform),
				max.perc.left = max(sub$percentage_left),
				max.perc.right = max(sub$percentage_right),
				parent1 = trio$parent1, 
				parent2 = trio$parent2
			)
		} else { 
			new <- c()
		}
		
	} else {
		new <- c()
	}
	return(new)
}		


#which sites are informative given parents (i.e. how many sites do they differ from one another?)
inform.sites <- function(comb){
	output <- c()
	for(j in c(1:ncol(comb))){
		if (comb[1,j] != comb[3,j]){
			output <- c(output,j)
		}
	}	
	return(output)
}
	
#does the daughter sequece match one, both, or neither parent at each site?			
determine.matches <- function(site){				

		#base pairs at the site for each sequence
		bp.q <- site[2]
		bp.a <- site[1]
		bp.b <- site[3]

		#if the focal sequence matches parent a
		if(bp.q == bp.a & bp.q != bp.b){
				return(1)
		} 
						
		#if the focal sequence matches both parent a and parent b
		if(bp.q == bp.a & bp.q == bp.b){
			return(0)
		} 
	
		#if the focal sequence matches parent b
		if(bp.q != bp.a & bp.q == bp.b){
			return(-1)
		} 

		#if the focal sequence does match either parent, give it an NA
		if(bp.q != bp.a & bp.q != bp.b){
			return(NA)
		} 	
}


#determine range of sites over which to compare parent sequences with the daughter sequence
site.range <- function(inform_sites){
	mx <- max(inform_sites) -1 
	mn <- min(inform_sites) + 1 
	output <- c(mn:mx)
}

#calculate a score (1,-1, or 0) for every site
calculate.scores <- function(site_range,parent,inform_sites,numb_inform_sites,unmatched_sites){

	new.scores <- rbind()						
	for(site in site_range){

		#scores for sites that are informative to the left and right of the proposed breakpoint
		left_inform <- parent[inform_sites[inform_sites <= site]]
		right_inform <- parent[inform_sites[inform_sites > site]]

		#calculate percentage of informative sites to the left that match parent 1
		percentage_left <- (sum(left_inform == 1)/length(left_inform))

		#calculate percentage of informative sites to the right that match parent 2
		percentage_right <- (sum(right_inform == -1)/length(right_inform))
						
		#if 100% on both sides match, mark as possible chimera
		if(percentage_left == 1 & percentage_right == 1){
			full_match <- "yes"
		} else {
			full_match <- "no"
		}

		#percentage of total informative sites indicating correct match
		proportion_inform <- (percentage_left*length(left_inform) + percentage_right*length(right_inform))/(length(left_inform) + length(right_inform))

		#generate report on breakpoint site
		new <- data.frame(site = site,		
			full_match, 
			numb_inform_sites,
			unmatched_sites,
			length(left_inform), 
			length(right_inform),					
			percentage_left,			
			percentage_right, 
			proportion_inform 
		)
	
		new.scores <- rbind(new.scores,new)
	}
	return(new.scores)
}					


#runs through recombinant sequences to find possible chimeras
find.chimeras <- function(s){

	#which sequence are we looking at?
	seq_i <<- as.character(s$seqID[1])

	#how many samples was it identified in?
	recomb_numb <- length(levels(factor(s$sampleID)))

	#how many samples was it found in period?
	sample_numb <- as.numeric(allele_totals[seq_i])
	
	#was it a chimera in all samples
	if(recomb_numb == sample_numb){
		all_samples <- "yes"
	
	#was it identified as a chimera in fewer than all samples (where it occured)
	} else {		
		all_samples <- "no"
	}
	
	#possible parents
	pars <<- s[,c("parent1","parent2")]
	
	#what were the possible parent combinations
	parent_combs <- unique(paste(s$parent1, s$parent2, sep = "_"))
	
	#how many unique combinations of parents were idnetified
	parent_numb <- length(parent_combs)

	#which particular samples had the possible chimera as an allele?
	sub <- all_TAs[all_TAs$allele == seq_i,]
		
	#do the other samples have the possible parents as well?
	other_samps <- ddply(sub,.(sampleID), check.for.parents)

	#what is the proportion of all samples that have parents?
	proportion_match <- (sum(other_samps$match == "yes")/sample_numb)

	#combine results together
	output <- data.frame(allele = seq_i,
		all_samples = all_samples,
		recomb_numb = recomb_numb,
		sample_numb = sample_numb,
		parent_matches = sum(other_samps$match == "yes"),
		proportion_match = proportion_match
	)

	return(output)
}


#check samples with putative chimeras whether they the possible parent sequences?
check.for.parents <- function(id){

	#which sample are we dealing with?
	samp_i <- as.character(id$sampleID)			

	#create path to fish files
	path <- paste(samp_i, ".fasta",sep = "") 
			
	#list of all sequences present in that sample
	samp_seqs <- names(read.dna(path, format = "fasta", as.character = TRUE))

	#are there possible parents in the list of all sequences?	
	for (i in 1:nrow(pars)){
		if(pars[i,1] %in% samp_seqs & pars[i,2] %in% samp_seqs) {
			match <- "yes"
			break()
		} else {
			match <- "no"
		}
	}
				
	#output the results for this sample
	id_results <- data.frame(seq = seq_i,
		sample = samp_i,
		match = match	
	)
			
	return(id_results)
}
