# Supplementary material for: Stepwise Threshold Clustering: A New Method for Genotyping MHC Loci Using Next-Generation Sequencing Technology
Source: PLoS One. 2014 Jul 18;9(7):e100587. doi: 10.1371/journal.pone.0100587 (PMC4103772; doi:10.1371/journal.pone.0100587)
Supplement: Table S2 — Genotyping results for individual samples. (XLS) [file pone.0100587.s005.xls]

## Sheet: Sheet1
sample ID	duplicate	reads	good clusters	dropped alleles	chimeras	incorrect length	true alleles	divergent alleles
38	A	535	6	0	0	0	6	1
63	A	401	6	0	0	0	6	1
82	A	400	5	2	0	0	7	2
140	A	363	5	1	0	0	6	1
256	A	0	NA	NA	NA	NA	NA	0
259	A	277	7	1	0	0	8	2
261	A	28	NA	NA	NA	NA	NA	0
264	A	142	7	1	0	1	7	2
265	A	121	6	1	0	0	7	2
266	A	421	7	1	0	0	8	2
268	A	496	6	1	0	0	7	2
269	A	306	7	0	0	0	7	1
270	A	176	4	0	0	0	4	1
273	A	196	3	2	0	0	5	1
275	A	134	6	0	0	0	6	0
276	A	111	5	0	0	0	5	1
280	A	41	NA	NA	NA	NA	NA	0
281	A	21	NA	NA	NA	NA	NA	0
282	A	387	6	1	0	0	7	1
283	A	181	5	0	0	0	5	1
287	A	219	5	0	0	0	5	1
288	A	6	NA	NA	NA	NA	NA	0
290	A	229	5	0	0	0	5	1
291	A	90	6	0	0	0	6	0
294	A	172	6	0	0	0	6	0
295	A	48	NA	NA	NA	NA	NA	0
296	A	346	6	1	0	1	6	1
298	A	395	3	1	0	0	4	2
299	A	407	6	0	0	0	6	1
300	A	318	6	1	0	0	7	0
302	A	176	7	0	1	0	6	0
303	A	292	3	1	0	0	4	1
304	A	78	NA	NA	NA	NA	NA	0
305	A	164	4	1	0	0	5	1
306	A	48	NA	NA	NA	NA	NA	0
307	A	172	7	1	0	0	8	1
308	A	126	6	0	0	0	6	0
310	A	669	4	1	0	0	5	2
313	A	285	3	2	0	0	5	2
316	A	115	4	0	0	0	4	0
317	A	924	5	0	0	0	5	0
318	A	813	7	1	0	0	8	2
319	A	379	8	0	0	1	7	0
320	A	586	5	2	0	0	7	1
324	A	181	5	0	0	0	5	0
325	A	309	5	1	0	0	6	1
329	A	116	5	0	0	0	5	0
330	A	401	9	0	0	0	9	2
331	A	71	NA	NA	NA	NA	NA	0
332	A	509	10	1	0	1	10	0
334	A	184	7	1	0	1	7	1
339	A	78	NA	NA	NA	NA	NA	0
341	A	397	5	1	0	0	6	1
345	A	300	4	0	0	0	4	1
349	A	36	NA	NA	NA	NA	NA	0
354	A	1009	8	0	0	0	8	2
363	A	121	5	0	0	0	5	0
365	A	2417	8	0	0	1	7	1
366	A	0	NA	NA	NA	NA	NA	0
368	A	1	NA	NA	NA	NA	NA	0
369	A	351	5	1	0	0	6	1
370	A	461	8	1	1	0	8	1
371	A	751	5	3	0	0	8	1
372	A	249	3	1	0	0	4	1
373	A	1398	6	0	0	0	6	1
374	A	1891	7	0	0	0	7	1
375	A	155	5	1	0	0	6	1
376	A	179	4	0	0	0	4	0
377	A	4687	9	3	0	0	12	2
378	A	2	NA	NA	NA	NA	NA	0
379	A	269	5	0	0	0	5	0
380	A	45	NA	NA	NA	NA	NA	0
381	A	391	4	2	0	0	6	1
382	A	286	4	2	0	0	6	1
383	A	224	2	0	0	0	2	0
384	A	0	NA	NA	NA	NA	NA	0
385	A	355	3	0	0	0	3	1
386	A	697	8	0	0	1	7	1
387	A	1783	5	0	0	0	5	1
388	A	1552	3	3	0	0	6	2
389	A	114	7	0	0	0	7	1
390	A	3	NA	NA	NA	NA	NA	0
391	A	292	6	0	0	0	6	1
392	A	0	NA	NA	NA	NA	NA	0
393	A	126	5	1	0	0	6	1
394	A	306	7	0	0	1	6	1
395	A	692	5	0	0	0	5	1
396	A	1	NA	NA	NA	NA	NA	0
397	A	401	6	1	0	0	7	1
398	A	315	8	2	0	0	10	0
399	A	356	7	0	0	0	7	1
400	A	634	6	0	0	0	6	1
401	A	65	NA	NA	NA	NA	NA	0
403	A	127	8	1	0	0	9	1
404	A	144	7	2	0	0	9	2
405	A	540	6	0	0	0	6	2
406	A	221	5	1	0	0	6	1
407	A	410	7	1	0	0	8	2
408	A	228	8	1	0	1	8	1
409	A	561	6	1	0	0	7	1
410	A	110	8	0	0	0	8	1
412	A	571	8	1	0	0	9	1
413	A	105	7	0	0	0	7	0
414	A	531	5	2	0	0	7	2
415	A	1	NA	NA	NA	NA	NA	0
416	A	263	5	0	0	0	5	0
417	A	97	8	2	0	2	8	1
418	A	154	3	0	0	0	3	0
419	A	116	5	0	0	0	5	1
420	A	320	5	1	0	0	6	1
421	A	427	5	1	0	0	6	1
422	A	131	5	0	0	1	4	0
423	A	538	5	0	0	0	5	0
424	A	499	5	1	0	0	6	1
430	A	807	4	1	0	0	5	1
431	A	95	2	1	0	0	3	0
433	A	871	5	2	0	0	7	2
436	A	256	6	1	0	0	7	1
437	A	273	5	1	0	0	6	1
438	A	894	3	3	0	0	6	2
440	A	343	6	1	0	0	7	1
441	A	302	5	1	0	0	6	1
442	A	79	NA	NA	NA	NA	NA	0
443	A	203	5	1	0	0	6	1
444	A	232	7	0	0	0	7	0
445	A	129	5	0	0	0	5	0
447	A	272	5	1	0	0	6	1
448	A	499	7	1	0	0	8	1
449	A	315	8	2	0	0	10	1
450	A	558	5	1	0	0	6	1
451	A	553	9	1	0	0	10	1
452	A	59	NA	NA	NA	NA	NA	0
453	A	309	6	1	0	0	7	1
454	A	299	5	1	0	0	6	1
455	A	69	NA	NA	NA	NA	NA	0
456	A	148	6	1	0	0	7	1
457	A	242	6	1	0	0	7	1
458	A	249	7	0	0	0	7	0
459	A	469	6	1	0	0	7	1
460	A	493	5	1	0	0	6	1
461	A	413	7	0	0	0	7	1
462	A	329	6	0	0	0	6	1
463	A	233	6	0	0	0	6	1
464	A	433	6	0	0	0	6	1
465	A	142	6	0	0	0	6	1
466	A	136	4	0	0	0	4	0
467	A	400	6	0	0	0	6	1
468	A	346	7	2	0	1	8	2
469	A	422	10	0	1	0	9	1
470	A	472	7	1	0	0	8	1
471	A	275	6	1	0	0	7	2
472	A	71	NA	NA	NA	NA	NA	0
473	A	208	8	1	1	0	8	0
474	A	163	5	1	0	0	6	1
476	A	220	4	0	0	0	4	1
477	A	344	9	2	1	0	10	2
478	A	322	6	2	0	1	7	1
479	A	732	6	2	0	0	8	2
480	A	260	6	1	0	0	7	1
481	A	355	5	0	0	0	5	0
482	A	379	8	2	0	0	10	1
483	A	325	5	1	0	1	5	0
484	A	116	5	0	0	0	5	0
485	A	134	8	1	0	0	9	0
486	A	172	6	2	0	0	8	1
487	A	623	5	2	0	0	7	1
488	A	204	5	0	0	0	5	0
489	A	263	4	1	0	0	5	1
490	A	330	6	1	0	0	7	1
491	A	558	6	0	0	0	6	1
493	A	345	5	1	0	0	6	1
494	A	61	NA	NA	NA	NA	NA	0
495	A	86	5	0	0	0	5	0
496	A	119	8	2	0	1	9	1
497	A	144	7	0	0	0	7	1
498	A	181	6	0	0	0	6	0
499	A	599	7	2	0	0	9	1
500	A	0	NA	NA	NA	NA	NA	0
501	A	830	7	0	1	0	6	1
502	A	377	7	1	0	0	8	1
503	A	312	6	0	0	0	6	1
504	A	244	6	0	0	0	6	0
505	A	27	NA	NA	NA	NA	NA	0
506	A	52	NA	NA	NA	NA	NA	0
507	A	71	NA	NA	NA	NA	NA	0
508	A	88	6	1	0	0	7	1
509	A	205	5	1	0	0	6	1
511	A	2	NA	NA	NA	NA	NA	0
512	A	0	NA	NA	NA	NA	NA	0
513	A	0	NA	NA	NA	NA	NA	0
514	A	571	3	2	0	0	5	2
515	A	4	NA	NA	NA	NA	NA	0
516	A	38	NA	NA	NA	NA	NA	0
517	A	49	NA	NA	NA	NA	NA	0
518	A	54	NA	NA	NA	NA	NA	0
519	A	156	6	1	0	1	6	1
520	A	170	8	0	0	2	6	1
521	A	65	NA	NA	NA	NA	NA	0
522	A	328	4	0	0	0	4	0
524	A	0	NA	NA	NA	NA	NA	0
926	A	0	NA	NA	NA	NA	NA	0
927	A	236	3	0	0	0	3	1
928	A	0	NA	NA	NA	NA	NA	0
929	A	593	8	0	0	0	8	1
930	A	177	3	0	0	0	3	1
931	A	110	7	2	0	1	8	1
932	A	49	NA	NA	NA	NA	NA	0
933	A	1	NA	NA	NA	NA	NA	0
934	A	186	8	0	0	0	8	2
935	A	18	NA	NA	NA	NA	NA	0
936	A	374	6	0	0	0	6	1
937	A	3362	6	0	0	0	6	1
939	A	1103	8	0	0	0	8	2
940	A	371	8	0	0	0	8	2
950	A	291	7	0	0	0	7	1
952	A	88	5	0	0	1	4	0
954	A	167	6	2	0	0	8	2
955	A	307	7	0	0	1	6	1
956	A	115	6	0	0	0	6	1
1001	A	372	8	1	0	0	9	2
1004	A	0	NA	NA	NA	NA	NA	0
1005	A	154	8	1	0	0	9	1
1006	A	154	5	1	0	0	6	1
1007	A	6	NA	NA	NA	NA	NA	0
1008	A	830	7	0	0	0	7	2
1011	A	574	6	1	0	0	7	1
1012	A	61	NA	NA	NA	NA	NA	0
1013	A	118	3	0	0	0	3	0
1014	A	456	5	1	0	0	6	1
1018	A	0	NA	NA	NA	NA	NA	0
1019	A	683	7	2	0	0	9	2
1020	A	422	9	3	0	0	12	1
1021	A	626	9	1	0	0	10	1
1024	A	1065	9	0	0	0	9	1
1025	A	349	7	0	0	0	7	1
1027	A	90	6	0	0	2	4	1
1029	A	627	5	0	0	0	5	1
1030	A	432	5	1	0	0	6	1
1031	A	334	7	2	0	0	9	1
1040	A	40	NA	NA	NA	NA	NA	0
1041	A	333	8	1	0	0	9	1
1043	A	447	5	2	1	0	6	1
1044	A	83	5	0	0	0	5	1
1047	A	553	7	2	0	0	9	2
1049	A	210	6	0	0	0	6	1
1050	A	191	7	0	0	0	7	1
1060	A	167	9	2	0	0	11	2
1062	A	38	NA	NA	NA	NA	NA	0
1065	A	522	5	1	1	0	5	2
1066	A	397	3	2	0	0	5	2
1067	A	1038	8	3	0	0	11	2
1068	A	123	5	0	0	0	5	1
1071	A	320	5	0	0	0	5	1
1073	A	132	7	0	0	0	7	1
1074	A	164	8	0	0	0	8	2
1076	A	158	7	0	0	0	7	1
1078	A	138	6	0	0	0	6	1
1082	A	701	7	1	0	0	8	2
1083	A	2556	8	0	0	0	8	1
1086	A	34	NA	NA	NA	NA	NA	0
1094	A	393	10	0	0	0	10	0
1097	A	332	10	2	0	0	12	1
1098	A	66	NA	NA	NA	NA	NA	0
1099	A	646	9	1	0	0	10	1
1100	A	438	5	1	0	0	6	1
1101	A	161	5	0	0	0	5	0
1102	A	171	4	0	0	0	4	0
1104	A	239	7	0	0	0	7	0
1105	A	104	9	0	0	0	9	1
1106	A	756	6	2	0	0	8	2
1107	A	1131	8	1	0	0	9	1
1108	A	694	4	2	0	0	6	2
1111	A	707	6	3	0	0	9	2
1113	A	191	5	0	0	0	5	0
1114	A	147	6	1	0	0	7	1
1115	A	193	7	0	0	0	7	1
1117	A	384	4	0	0	0	4	1
1119	A	261	7	0	0	0	7	0
1120	A	457	6	1	1	0	6	1
1121	A	246	8	0	0	0	8	2
1122	A	325	6	0	0	0	6	1
1123	A	2516	9	0	0	1	8	1
1124	A	4529	5	2	0	0	7	2
1125	A	4	NA	NA	NA	NA	NA	0
1126	A	0	NA	NA	NA	NA	NA	0
1134	A	225	5	1	0	0	6	1
1157	A	102	8	1	0	0	9	1
1158	A	945	5	4	0	0	9	2
1159	A	845	6	1	0	0	7	1
1160	A	1060	5	1	0	0	6	2
1161	A	1013	8	1	0	0	9	1
1162	A	511	4	1	0	0	5	1
1163	A	350	6	0	0	0	6	1
1166	A	2	NA	NA	NA	NA	NA	0
1174	A	3	NA	NA	NA	NA	NA	0
1178	A	2018	7	1	0	1	7	1
1179	A	58	NA	NA	NA	NA	NA	0
1180	A	27	NA	NA	NA	NA	NA	0
1181	A	920	7	3	0	0	10	1
1182	A	226	8	1	0	0	9	1
1183	A	259	5	0	0	0	5	0
1185	A	220	8	1	0	1	8	1
1186	A	200	6	0	0	0	6	1
1187	A	199	5	1	0	0	6	1
1189	A	14	NA	NA	NA	NA	NA	0
1190	A	3	NA	NA	NA	NA	NA	0
1191	A	0	NA	NA	NA	NA	NA	0
1193	A	264	7	2	0	0	9	2
1194	A	125	9	1	0	0	10	0
1196	A	237	7	2	0	0	9	2
1207	A	49	NA	NA	NA	NA	NA	0
1211	A	200	4	0	0	0	4	1
1221	A	338	5	0	0	0	5	1
1222	A	0	NA	NA	NA	NA	NA	0
1290	A	13	NA	NA	NA	NA	NA	0
1320	A	70	NA	NA	NA	NA	NA	0
1321	A	191	3	0	0	0	3	1
1323	A	81	3	1	0	0	4	1
1324	A	272	6	1	0	0	7	1
1325	A	83	7	0	0	0	7	1
1326	A	303	6	1	0	0	7	1
1327	A	380	6	1	0	0	7	1
1328	A	627	5	0	0	0	5	1
1329	A	529	5	4	0	0	9	1
1330	A	250	7	1	0	0	8	1
1331	A	115	6	1	0	0	7	1
1334	A	39	NA	NA	NA	NA	NA	0
1339	A	358	7	3	0	0	10	2
1343	A	362	4	1	0	0	5	2
1350	A	322	7	0	0	0	7	1
1351	A	426	6	2	0	0	8	1
1353	A	710	5	0	0	0	5	1
1354	A	318	5	0	0	0	5	0
1355	A	336	7	1	0	1	7	1
1356	A	0	NA	NA	NA	NA	NA	0
1357	A	62	NA	NA	NA	NA	NA	0
1358	A	93	6	1	0	0	7	2
1361	A	285	4	1	0	0	5	1
1363	A	414	4	0	0	0	4	1
1364	A	4	NA	NA	NA	NA	NA	0
1365	A	862	8	0	0	0	8	1
1366	A	421	5	1	0	0	6	1
1367	A	404	7	0	0	0	7	0
1368	A	662	6	1	0	0	7	1
1369	A	598	7	0	0	0	7	1
1370	A	98	4	0	0	0	4	1
1372	A	224	4	1	0	0	5	1
1373	A	130	5	0	0	0	5	1
1374	A	270	8	1	0	0	9	1
1375	A	589	8	3	0	0	11	2
1376	A	764	6	2	0	0	8	1
1383	A	1146	2	2	0	0	4	2
1384	A	610	6	0	1	0	5	1
1385	A	270	6	1	0	0	7	1
1386	A	120	6	1	0	0	7	1
1388	A	258	8	0	0	0	8	1
1389	A	131	8	0	0	0	8	1
1392	A	379	4	1	0	0	5	1
1395	A	446	4	1	0	0	5	2
1396	A	330	8	0	0	1	7	1
1397	A	765	6	1	0	0	7	1
1398	A	599	7	0	0	0	7	1
1402	A	1253	8	0	0	0	8	1
1403	A	386	7	0	0	0	7	1
1076	B	0	NA	NA	NA	NA	NA	NA
1106	B	0	NA	NA	NA	NA	NA	0
1111	B	0	NA	NA	NA	NA	NA	0
1114	B	0	NA	NA	NA	NA	NA	0
1117	B	0	NA	NA	NA	NA	NA	0
1134	B	0	NA	NA	NA	NA	NA	0
1350	B	0	NA	NA	NA	NA	NA	0
1356	B	5	NA	NA	NA	NA	NA	0
1361	B	149	4	0	0	0	4	0
1385	B	143	6	1	0	0	7	1
1397	B	114	6	1	0	0	7	1
298	B	0	NA	NA	NA	NA	NA	0
324	B	0	NA	NA	NA	NA	NA	0
329b	B	8	NA	NA	NA	NA	NA	0
349	B	45	NA	NA	NA	NA	NA	0
363	B	42	NA	NA	NA	NA	NA	0
368	B	35	NA	NA	NA	NA	NA	0
379	B	0	NA	NA	NA	NA	NA	0
388	B	109	3	0	0	0	3	0
403	B	196	8	0	0	0	8	0
82	B	440	5	1	0	0	6	1
