# Supplementary material for: Stepwise Threshold Clustering: A New Method for Genotyping MHC Loci Using Next-Generation Sequencing Technology
Source: PLoS One. 2014 Jul 18;9(7):e100587. doi: 10.1371/journal.pone.0100587 (PMC4103772; doi:10.1371/journal.pone.0100587)
Supplement: Table S4 — Combined pairs of sequences from sample X. (XLS) [file pone.0100587.s007.xls]

## Sheet: Sheet1
		member one			member two
pair	type	sequence	# reads	length	sequence	# reads	length
1367	1	3111	48	213	26826	1	214
1353	1	3111	48	213	21704	1	214
1339	1	3111	48	213	13202	1	214
1314	1	3111	48	213	6385	1	214
834	1	3111	48	213	593	4	214
162	1	103	39	213	14953	1	214
120	1	103	39	213	1706	1	214
80	1	5	36	213	22522	2	214
79	1	5	36	213	22475	2	212
35	1	5	36	213	6041	1	214
12	1	5	36	213	640	1	214
4	1	5	36	213	121	5	214
453	1	195	32	213	12217	1	214
739	1	298	22	213	12313	1	214
711	1	298	22	213	5486	1	214
695	1	298	22	213	801	1	214
693	1	298	22	213	701	2	214
205	1	113	19	213	208	7	214
1660	1	5221	4	213	18546	1	214
2466	1	24865	2	213	26826	1	214
1858	1	6573	2	213	20225	1	214
1368	2	3111	48	213	27259	1	213
1363	2	3111	48	213	24865	2	213
78	2	5	36	213	22462	1	213
2467	2	24865	2	213	27259	1	213
1378	3	3111	48	213	30045	1	214
1364	3	3111	48	213	25179	1	214
1359	3	3111	48	213	22808	1	212
1358	3	3111	48	213	22522	2	214
1357	3	3111	48	213	22475	2	212
1313	3	3111	48	213	6041	1	214
917	3	3111	48	213	640	1	214
319	3	3111	48	213	121	5	214
163	3	103	39	213	14974	1	214
89	3	5	36	213	26826	1	214
75	3	5	36	213	21704	1	214
70	3	5	36	213	18546	1	214
61	3	5	36	213	13202	1	214
36	3	5	36	213	6385	1	214
11	3	5	36	213	593	4	214
482	3	195	32	213	26100	1	214
477	3	195	32	213	23316	1	214
476	3	195	32	213	22976	1	214
413	3	195	32	213	1437	1	214
753	3	298	22	213	20225	1	214
747	3	298	22	213	16212	1	214
744	3	298	22	213	15848	1	214
225	3	113	19	213	3574	1	214
1670	3	5221	4	213	22522	2	214
1669	3	5221	4	213	22475	2	212
1625	3	5221	4	213	6041	1	214
920	3	5221	4	213	640	1	214
