# Supplementary material for: Stepwise Threshold Clustering: A New Method for Genotyping MHC Loci Using Next-Generation Sequencing Technology
Source: PLoS One. 2014 Jul 18;9(7):e100587. doi: 10.1371/journal.pone.0100587 (PMC4103772; doi:10.1371/journal.pone.0100587)
Supplement: Table S6 — Allele frequencies, G-tests, and sub-sampling analysis results (Roberts). G-statistics are from tests of whether the lake and stream differ significantly in allele frequency for each given allele. The proportion of sub-samples where sample size was divided in half (total = 10000) where the allele was statistically significant between habitats (α = 0.05) is given. Both p-values and proportion of significant sub-samples are shown when p-values are unadjusted and adjusted using a false discovery rate of 5%. (XLS) [file pone.0100587.s009.xls]

## Sheet: Sheet1
	lake			stream
allele	frequency	95% CI lower bound	95% CI upper bound	frequency	95% CI lower bound	95% CI upper bound	G-statistic	P-value	proportion of subsamples significant	adjusted P-value	proportion of subsamples significant (adjusted P-value)
X265	0.01	0	0.05	0.32	0.202855	0.459636	36.8789	0	1	0	0.915
X40	0	0	0.03	0.32	0.202855	0.459636	31.583	0	0.996	0	0.837
X120	0.26	0.18	0.35	0	0	0.0637501	21.2654	0	0.997	0.000178667	0.423
X347	0	0	0.03	0.2	0.102348	0.324333	19.8745	0	0.929	0.00027805	0.363
X336	0.01	0	0.05	0.21	0.115922	0.344395	17.7579	0	0.891	0.00067268	0.322
X103	0.34	0.25	0.44	0.68	0.540364	0.797145	15.4346	0	0.834	0.0017688	0.294
X298	0.2	0.13	0.29	0	0	0.0637501	15.2851	0	0.917	0.0017688	0.044
X132	0.02	0	0.07	0.18	0.089101	0.303972	10.7743	0.001	0.649	0.0172391	0.102
X670	0.14	0.08	0.22	0	0	0.0637501	9.73051	0.002	0.473	0.0242848	0
X707	0.14	0.08	0.22	0	0	0.0637501	9.73051	0.002	0.471	0.0242848	0
X20	0.38	0.29	0.48	0.16	0.0762187	0.28328	7.81894	0.005	0.434	0.0629824	0.04
X267	0.02	0	0.07	0.14	0.0637514	0.262217	7.20949	0.007	0.374	0.0750895	0.019
X124	0.19	0.12	0.28	0.04	0.00435481	0.123132	7.20138	0.007	0.297	0.0750895	0.01
X157	0.1	0.05	0.18	0	0	0.0637501	6.28648	0.012	0.107	0.108686	0
X181	0.1	0.05	0.18	0	0	0.0637501	6.28648	0.012	0.078	0.108686	0
X276	0.18	0.11	0.27	0.38	0.249184	0.514522	6.16618	0.013	0.321	0.109055	0.023
X581	0.1	0.05	0.17	0	0	0.0637501	5.46396	0.019	0.043	0.153018	0
X162	0.12	0.07	0.2	0.29	0.172952	0.422099	5.21243	0.022	0.237	0.166949	0.01
X195	0.29	0.2	0.38	0.13	0.0517645	0.240733	4.76168	0.029	0.194	0.195739	0.01
X1238	0.12	0.07	0.2	0.02	0.000452002	0.0955259	4.65744	0.031	0.149	0.195739	0
X113	0.37	0.28	0.47	0.2	0.102348	0.324333	4.6242	0.032	0.214	0.195739	0.014
X595	0.21	0.14	0.3	0.07	0.0198039	0.172905	4.59122	0.032	0.15	0.195739	0.008
X578	0.01	0	0.05	0.09	0.0296298	0.196193	4.20558	0.04	0.099	0.234382	0
X323	0.02	0	0.07	0.11	0.0403479	0.218756	4.03094	0.045	0.141	0.234382	0
X80	0.11	0.06	0.19	0.02	0.000452002	0.0955259	3.97067	0.046	0.087	0.234382	0
X1	0.25	0.17	0.34	0.11	0.0403479	0.218756	3.94913	0.047	0.123	0.234382	0.007
X112	0.08	0.03	0.14	0	0	0.0637501	3.8762	0.049	0.005	0.234382	0
X393	0.08	0.03	0.14	0	0	0.0637501	3.8762	0.049	0.002	0.234382	0
X1027	0.07	0.03	0.13	0	0	0.0637501	3.11694	0.077	0	0.346045	0
X10	0.28	0.19	0.37	0.14	0.0637514	0.262217	3.10385	0.078	0.104	0.346045	0.003
X1332	0	0	0.03	0.05	0.011187	0.148674	3.06378	0.08	0	0.346045	0
X655	0.01	0	0.05	0.07	0.0198039	0.172905	2.65413	0.103	0.033	0.423143	0
X831	0.02	0	0.07	0.09	0.0296298	0.196193	2.63995	0.104	0.066	0.423143	0
X192	0.06	0.02	0.12	0	0	0.0637501	2.38721	0.122	0	0.468356	0
X53	0.06	0.02	0.12	0	0	0.0637501	2.38721	0.122	0	0.468356	0
X23	0.16	0.1	0.25	0.27	0.158325	0.40302	1.89913	0.168	0.065	0.625988	0
X3017	0	0	0.03	0.04	0.00435481	0.123132	1.36424	0.243	0	0.781541	0
X223	0.01	0	0.05	0.05	0.011187	0.148674	1.30471	0.253	0	0.781541	0
X5	0.5	0.4	0.59	0.39	0.264991	0.532463	1.16209	0.281	0.022	0.781541	0.001
X167	0.1	0.05	0.18	0.18	0.089101	0.303972	1.1277	0.288	0.033	0.781541	0.001
X437	0.04	0.01	0.09	0	0	0.0637501	1.05625	0.304	0	0.781541	0
X915	0.04	0.01	0.09	0	0	0.0637501	1.05625	0.304	0	0.781541	0
X55	0.03	0.01	0.08	0.07	0.0198039	0.172905	0.713	0.398	0.007	0.781541	0
X8	0.06	0.02	0.12	0.02	0.000452002	0.0955259	0.620871	0.431	0	0.781541	0
X1558	0.02	0	0.07	0.05	0.011187	0.148674	0.502407	0.478	0	0.781541	0
X1264	0.03	0.01	0.08	0	0	0.0637501	0.498134	0.48	0	0.781541	0
X525	0.03	0.01	0.08	0	0	0.0637501	0.498134	0.48	0	0.781541	0
X849	0.03	0.01	0.08	0	0	0.0637501	0.498134	0.48	0	0.781541	0
X882	0.03	0.01	0.08	0	0	0.0637501	0.498134	0.48	0	0.781541	0
X864	0.01	0	0.05	0.04	0.00435481	0.123132	0.297429	0.585	0	0.781541	0
X388	0.04	0.01	0.09	0.07	0.0198039	0.172905	0.289197	0.591	0.005	0.781541	0
X83	0.5	0.41	0.6	0.55	0.414717	0.686564	0.180677	0.671	0.007	0.781541	0
X1008	0.01	0	0.05	0	0	0.0637501	0.0978406	0.754	0	0.781541	0
X10176	0.01	0	0.05	0	0.000452002	0.0955259	0.0978406	0.754	0	0.781541	0
X1028	0.01	0	0.05	0	0	0.0637501	0.0978406	0.754	0	0.781541	0
X1103	0.01	0	0.05	0	0	0.0637501	0.0978406	0.754	0	0.781541	0
X1124	0.01	0	0.05	0	0	0.0637501	0.0978406	0.754	0	0.781541	0
X1149	0.01	0	0.05	0	0	0.0637501	0.0978406	0.754	0	0.781541	0
X1175	0.01	0	0.05	0	0	0.0637501	0.0978406	0.754	0	0.781541	0
X1180	0	0	0.03	0.02	0	0.0637501	0.0978406	0.754	0	0.781541	0
X129	0.01	0	0.05	0	0	0.0637501	0.0978406	0.754	0	0.781541	0
X1344	0	0	0.03	0.02	0	0.0637501	0.0978406	0.754	0	0.781541	0
X136	0.01	0	0.05	0	0.000452002	0.0955259	0.0978406	0.754	0	0.781541	0
X13641	0.01	0	0.05	0	0	0.0637501	0.0978406	0.754	0	0.781541	0
X1392	0	0	0.03	0.02	0	0.0637501	0.0978406	0.754	0	0.781541	0
X140	0.01	0	0.05	0	0	0.0637501	0.0978406	0.754	0	0.781541	0
X1499	0.01	0	0.05	0	0	0.0637501	0.0978406	0.754	0	0.781541	0
X1586	0.01	0	0.05	0	0	0.0637501	0.0978406	0.754	0	0.781541	0
X16	0.01	0	0.05	0	0	0.0637501	0.0978406	0.754	0	0.781541	0
X163	0.01	0	0.05	0	0	0.0637501	0.0978406	0.754	0	0.781541	0
X1736	0.01	0	0.05	0	0	0.0637501	0.0978406	0.754	0	0.781541	0
X1848	0.01	0	0.05	0	0	0.0637501	0.0978406	0.754	0	0.781541	0
X1921	0.01	0	0.05	0	0.000452002	0.0955259	0.0978406	0.754	0	0.781541	0
X1957	0.01	0	0.05	0	0	0.0637501	0.0978406	0.754	0	0.781541	0
X1962	0.01	0	0.05	0	0	0.0637501	0.0978406	0.754	0	0.781541	0
X1966	0.01	0	0.05	0	0	0.0637501	0.0978406	0.754	0	0.781541	0
X2085	0	0	0.03	0.02	0	0.0637501	0.0978406	0.754	0	0.781541	0
X217	0.01	0	0.05	0	0	0.0637501	0.0978406	0.754	0	0.781541	0
X2228	0.01	0	0.05	0	0	0.0637501	0.0978406	0.754	0	0.781541	0
X22988	0.01	0	0.05	0	0	0.0637501	0.0978406	0.754	0	0.781541	0
X241	0.01	0	0.05	0	0.000452002	0.0955259	0.0978406	0.754	0	0.781541	0
X247	0	0	0.03	0.02	0.000452002	0.0955259	0.0978406	0.754	0	0.781541	0
X2478	0.01	0	0.05	0	0.000452002	0.0955259	0.0978406	0.754	0	0.781541	0
X2554	0.01	0	0.05	0	0	0.0637501	0.0978406	0.754	0	0.781541	0
X2615	0.01	0	0.05	0	0	0.0637501	0.0978406	0.754	0	0.781541	0
X2720	0.01	0	0.05	0	0	0.0637501	0.0978406	0.754	0	0.781541	0
X2723	0.01	0	0.05	0	0	0.0637501	0.0978406	0.754	0	0.781541	0
X2867	0	0	0.03	0.02	0	0.0637501	0.0978406	0.754	0	0.781541	0
X3111	0.01	0	0.05	0	0	0.0637501	0.0978406	0.754	0	0.781541	0
X3309	0.01	0	0.05	0	0	0.0637501	0.0978406	0.754	0	0.781541	0
X3584	0.01	0	0.05	0	0	0.0637501	0.0978406	0.754	0	0.781541	0
X3644	0.01	0	0.05	0	0.000452002	0.0955259	0.0978406	0.754	0	0.781541	0
X3649	0.01	0	0.05	0	0	0.0637501	0.0978406	0.754	0	0.781541	0
X3662	0.01	0	0.05	0	0	0.0637501	0.0978406	0.754	0	0.781541	0
X4208	0.01	0	0.05	0	0	0.0637501	0.0978406	0.754	0	0.781541	0
X4218	0.01	0	0.05	0	0	0.0637501	0.0978406	0.754	0	0.781541	0
X44	0	0	0.03	0.02	0	0.0637501	0.0978406	0.754	0	0.781541	0
X5163	0.01	0	0.05	0	0	0.0637501	0.0978406	0.754	0	0.781541	0
X541	0.01	0	0.05	0	0.000452002	0.0955259	0.0978406	0.754	0	0.781541	0
X582	0.01	0	0.05	0	0	0.0637501	0.0978406	0.754	0	0.781541	0
X621	0.01	0	0.05	0	0	0.0637501	0.0978406	0.754	0	0.781541	0
X63	0.01	0	0.05	0	0	0.0637501	0.0978406	0.754	0	0.781541	0
X6409	0.01	0	0.05	0	0	0.0637501	0.0978406	0.754	0	0.781541	0
X642	0.01	0	0.05	0	0	0.0637501	0.0978406	0.754	0	0.781541	0
X6427	0	0	0.03	0.02	0	0.0637501	0.0978406	0.754	0	0.781541	0
X697	0.01	0	0.05	0	0	0.0637501	0.0978406	0.754	0	0.781541	0
X757	0.01	0	0.05	0	0	0.0637501	0.0978406	0.754	0	0.781541	0
X773	0.01	0	0.05	0	0	0.0637501	0.0978406	0.754	0	0.781541	0
X7830	0.01	0	0.05	0	0	0.0637501	0.0978406	0.754	0	0.781541	0
X802	0.01	0	0.05	0	0.000452002	0.0955259	0.0978406	0.754	0	0.781541	0
X86	0.01	0	0.05	0	0	0.0637501	0.0978406	0.754	0	0.781541	0
X881	0.01	0	0.05	0	0	0.0637501	0.0978406	0.754	0	0.781541	0
X948	0	0	0.03	0.02	0	0.0637501	0.0978406	0.754	0	0.781541	0
X992	0.01	0	0.05	0	0	0.0637501	0.0978406	0.754	0	0.781541	0
X1681	0.02	0	0.07	0	0	0.0637501	0.0901049	0.764	0	0.781541	0
X1715	0.02	0	0.07	0	0	0.0637501	0.0901049	0.764	0	0.781541	0
X1758	0.02	0	0.07	0	0.000452002	0.0955259	0.0901049	0.764	0	0.781541	0
X1852	0.01	0	0.05	0.02	0	0.0637501	0.0901049	0.764	0	0.781541	0
X1898	0.02	0	0.07	0	0	0.0637501	0.0901049	0.764	0	0.781541	0
X2530	0.02	0	0.07	0	0.000452002	0.0955259	0.0901049	0.764	0	0.781541	0
X2582	0.02	0	0.07	0	0.000452002	0.0955259	0.0901049	0.764	0	0.781541	0
X2712	0.02	0	0.07	0	0	0.0637501	0.0901049	0.764	0	0.781541	0
X291	0.02	0	0.07	0	0	0.0637501	0.0901049	0.764	0	0.781541	0
X375	0.01	0	0.05	0.02	0	0.0637501	0.0901049	0.764	0	0.781541	0
X440	0.02	0	0.07	0	0	0.0637501	0.0901049	0.764	0	0.781541	0
X529	0.02	0	0.07	0	0	0.0637501	0.0901049	0.764	0	0.781541	0
X54	0.02	0	0.07	0	0.000452002	0.0955259	0.0901049	0.764	0	0.781541	0
X623	0.01	0	0.05	0.02	0	0.0637501	0.0901049	0.764	0	0.781541	0
X673	0.01	0	0.05	0.02	0	0.0637501	0.0901049	0.764	0	0.781541	0
X819	0.02	0	0.07	0	0	0.0637501	0.0901049	0.764	0	0.781541	0
X857	0.02	0	0.07	0	0	0.0637501	0.0901049	0.764	0	0.781541	0
X1159	0.03	0.01	0.08	0.02	0.000452002	0.0955259	0.013204	0.909	0	0.908517	0
X1299	0.03	0.01	0.08	0.02	0.000452002	0.0955259	0.013204	0.909	0	0.908517	0
X1337	0.02	0	0.07	0.04	0.00435481	0.123132	0.013204	0.909	0	0.908517	0
